# Supplementary material for: Development and construct validation of a parent-proxy quality of life instrument in children with bronchopulmonary dysplasia aged 4–8 years old
Source: Springer Nature journal article supplement (doi:10.1007/s11136-018-2029-7), 2018-10-22
Supplement: MOESM3 [file 16218564]

**Development and construct validation of a parent-proxy quality of life instrument in children with bronchopulmonary dysplasia aged 4-8 years old**

Lysbert Meijer - Schaap<sup>1</sup>, MD, Anthony E.J. Dubois<sup>2,3</sup>, MD, PhD, Boudewijn J. Kollen<sup>4</sup>, PhD, Jet Tijmens – van der Hulst<sup>2</sup>, MSc, Bertine M.J. Flokstra – de Blok<sup>3,4</sup>, PhD, Elianne J.L.E. Vrijlandt<sup>2,3</sup>, MD, PhD

Affiliations: <sup>1</sup>Department of Pulmonary Diseases and Tuberculosis, University of Groningen, University Medical Center Groningen, Groningen, The Netherlands. <sup>2</sup>Department of Pediatrics, Division of Pediatric Pulmonology and Allergy, University of Groningen, University Medical Center Groningen, Groningen, The Netherlands. <sup>3</sup>GRIAC research institute, University of Groningen, University Medical Center Groningen, Groningen, The Netherlands. <sup>4</sup>Department of General Practice, University of Groningen, University Medical Center Groningen, Groningen, The Netherlands.

Corresponding author: L. Meijer – Schaap (l.schaap@umcg.nl).

**Correlation coefficients of all items entering validation phase with the selected measurements.**

| Items                                                     | BMI          | MAP         | FEV <sub>1</sub> | FVC          | CBCL<br>-TOT | TRF-<br>TOT | TRF-<br>AF   |
|-----------------------------------------------------------|--------------|-------------|------------------|--------------|--------------|-------------|--------------|
| Number of participants                                    | 42           | 42          | 40               | 38           | 36           | 19          | 19           |
| Coughing                                                  | .125         | .130        | -.116            | -.071        | .138         | .322        | -.221        |
| Wheezing                                                  | .024         | .098        | .109             | .110         | .180         | .085        | -.359        |
| Impaction of mucus in airways                             | .084         | .099        | -.071            | -.057        | .153         | .099        | .132         |
| Sputum in throat or airways                               | .034         | .195        | -.147            | -.085        | .036         | .402        | -.047        |
| Dyspnea when having a cold                                | .022         | .221        | -.127            | .029         | .180         | .391        | -.359        |
| Having attacks of dyspnea                                 | .013         | .149        | -.057            | -.079        | .120         | .101        | -.307        |
| Having a cold more often                                  | .070         | .124        | .045             | .034         | .169         | <b>.467</b> | -.208        |
| Having a cold that lasts longer                           | -.029        | .176        | .057             | .051         | .081         | <b>.588</b> | -.349        |
| Bronchial hyperreactivity                                 | .055         | .101        | -.017            | .089         | .222         | .446        | -.294        |
| Having earpain/otitis                                     | .108         | .173        | -.084            | .111         | .028         | .188        | -.031        |
| Trouble sleeping because of dyspnea                       | .014         | .245        | -.106            | -.131        | .042         | .193        | -.221        |
| Trouble sleeping because of coughing                      | .109         | .112        | -.061            | -.098        | .082         | .258        | -.139        |
| Need more sleep than other children                       | -.236        | .021        | -.124            | -.276        | .066         | -.008       | .010         |
| Difficulty progressing in school                          | .052         | .085        | .123             | .104         | .242         | <b>.621</b> | -.385        |
| Needing extra support at school                           | .124         | .164        | .051             | .104         | .288         | <b>.595</b> | -.402        |
| Difficulty concentrating                                  | .125         | -.062       | .206             | .158         | .219         | <b>.659</b> | -.230        |
| Being easily distracted                                   | .113         | -.056       | .186             | .155         | .162         | <b>.624</b> | -.234        |
| Requiring a lot of structure daily                        | .072         | .106        | .078             | .116         | .318         | <b>.466</b> | -.250        |
| Difficulty with arithmetic                                | .006         | <b>.315</b> | .143             | .183         | .053         | .314        | -.407        |
| Difficulty with grammar                                   | -.034        | .227        | -.032            | -.060        | -.063        | .327        | -.371        |
| Choking easily                                            | -.197        | .038        | -.077            | -.277        | .137         | .136        | -.224        |
| Stomach ache due to constipation                          | -.069        | -.171       | .160             | .156         | <b>.335</b>  | .337        | <b>-.590</b> |
| Difficulty eating a serving of food                       | <b>-.381</b> | .275        | -.065            | -.146        | .109         | .236        | -.060        |
| Taking a long time when eating                            | <b>-.395</b> | .200        | -.055            | -.146        | .140         | -.139       | .118         |
| Often don't want to eat                                   | <b>-.331</b> | .242        | -.021            | -.124        | .192         | .083        | -.120        |
| Feeling cold easily                                       | <b>-.419</b> | .083        | .064             | -.062        | -.040        | -.183       | .196         |
| Vomiting easily                                           | .023         | <b>.422</b> | -.294            | -.291        | -.054        | -.365       | <b>.464</b>  |
| Being sensitive to loud noises                            | <b>-.419</b> | -.074       | -.114            | -.186        | .236         | .041        | .159         |
| Problems with writing neatly                              | .090         | .069        | -.285            | -.115        | -.051        | .223        | .424         |
| Problems in physical education/sports                     | -.024        | .319        | <b>-.430</b>     | <b>-.542</b> | -.324        | .014        | .445         |
| Problems practicing swimming                              | -.148        | .250        | <b>-.481</b>     | <b>-.437</b> | -.193        | .404        | .141         |
| Easily tripping or falling                                | -.056        | -.015       | -.296            | <b>-.413</b> | .086         | .397        | .226         |
| Problems with cycling                                     | .018         | .198        | <b>-.468</b>     | <b>-.424</b> | -.108        | .388        | <b>.487</b>  |
| Problems with coordination or balance                     | .007         | .041        | <b>-.427</b>     | <b>-.438</b> | -.101        | .212        | <b>.638</b>  |
| Exertional dyspnea                                        | -.063        | <b>.328</b> | <b>-.360</b>     | <b>-.419</b> | -.137        | .242        | .004         |
| Easily tired during sports/exercise                       | -.027        | <b>.314</b> | -.270            | -.260        | -.148        | .234        | .244         |
| Not keeping up in exercise/playing                        | -.101        | <b>.385</b> | <b>-.339</b>     | <b>-.367</b> | -.193        | .404        | .141         |
| Trouble parting from parent(s)                            | .180         | .292        | .058             | .043         | .294         | -.119       | -.058        |
| Withdrawal from social situations                         | -.187        | -.005       | -.111            | -.186        | .153         | .317        | -.170        |
| Consults with the general practitioner                    | -.016        | -.011       | -.044            | .035         | .321         | .361        | -.454        |
| Feeling less self-confident                               | -.076        | .302        | -.118            | -.139        | .299         | .406        | -.109        |
| Fear of being left alone by parent(s)                     | .203         | .039        | .120             | .107         | <b>.369</b>  | -.065       | -.012        |
| Being shy                                                 | .067         | .081        | .181             | .159         | <b>.453</b>  | .119        | -.240        |
| Having scars of surgeries, punctures or intravenous lines | .053         | .079        | -.114            | -.039        | .279         | .452        | -.242        |
| Frequent need to use antibiotics                          | .022         | .053        | -.146            | -.065        | .210         | .112        | -.058        |
| Frequent need to use airway medication                    | -.006        | -.310       | -.241            | <b>.318</b>  | -.062        | .221        | -.302        |
| Frequent need to use medication                           | -.060        | .153        | -.271            | -.209        | .077         | <b>.511</b> | -.229        |

Significant correlations (P<0.05) are marked bold. Abbreviations: BMI= body mass index; MAP= mean arterial pressure; FEV<sub>1</sub>= Forced Expiratory Volume in 1 second; FVC= Forced Vital Capacity; CBCL-TOT= total scale of child behavior checklist; TRF-TOT= total scale of teacher report form, TRF-AF= scale sum of academic functioning of teacher report form, α= Cronbach's alpha.
