# Supplementary material for: Development and construct validation of a parent-proxy quality of life instrument in children with bronchopulmonary dysplasia aged 4–8 years old
Source: Springer Nature journal article supplement (doi:10.1007/s11136-018-2029-7), 2018-10-22
Supplement: MOESM4 [file 16218564]

**Development and construct validation of a parent-proxy quality of life instrument in children with bronchopulmonary dysplasia aged 4-8 years old**

Lysbert Meijer - Schaap<sup>1</sup>, MD, Anthony E.J. Dubois<sup>2,3</sup>, MD, PhD, Boudewijn J. Kollen<sup>4</sup>, PhD, Jet Tijmens – van der Hulst<sup>2</sup>, MSc, Bertine M.J. Flokstra – de Blok<sup>3,4</sup>, PhD, Elianne J.L.E. Vrijlandt<sup>2,3</sup>, MD, PhD

Affiliations: <sup>1</sup>Department of Pulmonary Diseases and Tuberculosis, University of Groningen, University Medical Center Groningen, Groningen, The Netherlands. <sup>2</sup>Department of Pediatrics, Division of Pediatric Pulmonology and Allergy, University of Groningen, University Medical Center Groningen, Groningen, The Netherlands. <sup>3</sup>GRIAC research institute, University of Groningen, University Medical Center Groningen, Groningen, The Netherlands. <sup>4</sup>Department of General Practice, University of Groningen, University Medical Center Groningen, Groningen, The Netherlands.

Corresponding author: L. Meijer – Schaap (l.schaap@umcg.nl).

**Example of the BPD-QoL (4-8 years): a parent-proxy questionnaire to measure health-related quality of life in children with bronchopulmonary dysplasia aged 4 to 8 years old.** Please note that this English translation has not been validated.

**Instructions**

This questionnaire is developed to determine the influence of bronchopulmonary dysplasia on the quality of life of your child. Please indicate for each question the amount of burden this item has on the quality of life of your child in your opinion. Please encircle one of the presented seven options:

- 0 = None
- 1 = Barely
- 2 = A little bit
- 3 = Fairly
- 4 = Quite
- 5 = Very
- 6 = Extremely

We ask you kindly to try to answer the questions in the way that you believe that your child would answer these. The questionnaire contains two pages.

**BPD-QoL (4-8 years): a questionnaire to measure health-related quality of life in children with bronchopulmonary dysplasia aged 4 to 8 years old.**

|                                                                    | None | Barely | A little bit | Fairly | Quite | Very | Extremely |
|--------------------------------------------------------------------|------|--------|--------------|--------|-------|------|-----------|
| <b>Pulmonary symptoms</b>                                          |      |        |              |        |       |      |           |
| <b>What is the amount of burden your child experiences with...</b> |      |        |              |        |       |      |           |
| 1 Pulmonary wheezing?                                              | 0    | 1      | 2            | 3      | 4     | 5    | 6         |
| 2 Having sputum in throat or airways?                              | 0    | 1      | 2            | 3      | 4     | 5    | 6         |
| 3 Being short of breath when having a cold?                        | 0    | 1      | 2            | 3      | 4     | 5    | 6         |
| 4 Having a cold more often than other children?                    | 0    | 1      | 2            | 3      | 4     | 5    | 6         |
| 5 Having a cold that lasts longer than in other children?          | 0    | 1      | 2            | 3      | 4     | 5    | 6         |
| 6 Having complaints of bronchial hyperreactivity?                  | 0    | 1      | 2            | 3      | 4     | 5    | 6         |
| <b>School functioning</b>                                          |      |        |              |        |       |      |           |
| <b>What is the amount of burden your child experiences with...</b> |      |        |              |        |       |      |           |
| 7 Having difficulty progressing in school?                         | 0    | 1      | 2            | 3      | 4     | 5    | 6         |
| 8 Needing extra support at school?                                 | 0    | 1      | 2            | 3      | 4     | 5    | 6         |
| 9 Having difficulty concentrating?                                 | 0    | 1      | 2            | 3      | 4     | 5    | 6         |
| 10 Being easily distracted?                                        | 0    | 1      | 2            | 3      | 4     | 5    | 6         |
| 11 Needing a lot of structure in daily life?                       | 0    | 1      | 2            | 3      | 4     | 5    | 6         |
| 12 Having difficulty with arithmetic?                              | 0    | 1      | 2            | 3      | 4     | 5    | 6         |
| 13 Having difficulty with grammar?                                 | 0    | 1      | 2            | 3      | 4     | 5    | 6         |

**BPD-QoL (4-8 years): a questionnaire to measure health-related quality of life in children with bronchopulmonary dysplasia aged 4 to 8 years old.**

|                                                                    | None | Barely | A little Bit | Fairly | Quite | Very | Extremely |
|--------------------------------------------------------------------|------|--------|--------------|--------|-------|------|-----------|
| <b>Growth and nutrition</b>                                        |      |        |              |        |       |      |           |
| <b>What is the amount of burden your child experiences with...</b> |      |        |              |        |       |      |           |
| 14                                                                 | 0    | 1      | 2            | 3      | 4     | 5    | 6         |
| 15                                                                 | 0    | 1      | 2            | 3      | 4     | 5    | 6         |
| 16                                                                 | 0    | 1      | 2            | 3      | 4     | 5    | 6         |
| 17                                                                 | 0    | 1      | 2            | 3      | 4     | 5    | 6         |
| 18                                                                 | 0    | 1      | 2            | 3      | 4     | 5    | 6         |
| 19                                                                 | 0    | 1      | 2            | 3      | 4     | 5    | 6         |
| 20                                                                 | 0    | 1      | 2            | 3      | 4     | 5    | 6         |
| <b>Exercise and locomotion</b>                                     |      |        |              |        |       |      |           |
| <b>What is the amount of burden your child experiences with...</b> |      |        |              |        |       |      |           |
| 21                                                                 | 0    | 1      | 2            | 3      | 4     | 5    | 6         |
| 22                                                                 | 0    | 1      | 2            | 3      | 4     | 5    | 6         |
| 23                                                                 | 0    | 1      | 2            | 3      | 4     | 5    | 6         |
| 24                                                                 | 0    | 1      | 2            | 3      | 4     | 5    | 6         |
| 25                                                                 | 0    | 1      | 2            | 3      | 4     | 5    | 6         |
| 26                                                                 | 0    | 1      | 2            | 3      | 4     | 5    | 6         |
| 27                                                                 | 0    | 1      | 2            | 3      | 4     | 5    | 6         |
| <b>Emotional functioning and health care concerns</b>              |      |        |              |        |       |      |           |
| <b>What is the amount of burden your child experiences with...</b> |      |        |              |        |       |      |           |
| 28                                                                 | 0    | 1      | 2            | 3      | 4     | 5    | 6         |
| 29                                                                 | 0    | 1      | 2            | 3      | 4     | 5    | 6         |
| 30                                                                 | 0    | 1      | 2            | 3      | 4     | 5    | 6         |
| 31                                                                 | 0    | 1      | 2            | 3      | 4     | 5    | 6         |
| 32                                                                 | 0    | 1      | 2            | 3      | 4     | 5    | 6         |
| 33                                                                 | 0    | 1      | 2            | 3      | 4     | 5    | 6         |
